# Supplementary material for: Thermal analysis of nanofluids in microfluidics using an infrared camera
Source: Royal Society of Chemistry journal article supplement (doi:10.1039/c2lc40222j), 2012-01-01
Supplement: c2lc40222j.pdf [file c2lc40222j.pdf]

## Supporting information

### Thermal analysis of nanofluids in microfluidics using an infrared camera

Pyshar Yi<sup>\*a</sup>, Aminuddin A. Kayani<sup>a</sup>, Adam F. Chrimes<sup>a</sup>, Kamran Ghorbani<sup>a</sup>, Saeid Nahavandi<sup>b</sup>,  
Kourosh Kalantar-zadeh<sup>\*a</sup>, and Khashayar Khoshmanesh<sup>\*a</sup>

<sup>\*</sup>Corresponding authors: Pyshar Yi, Khashayar Khoshmanesh and Kourosh Kalantar-zadeh  
Emails: pyshar.yi@gmail.com, khashayar.khoshmanesh@rmit.edu.au, and  
kourosh.kalantar@rmit.edu.au

Tel: +61 3 9925 3254, Fax: +61 3 99252007

#### Supplementary 1: Experimental setup

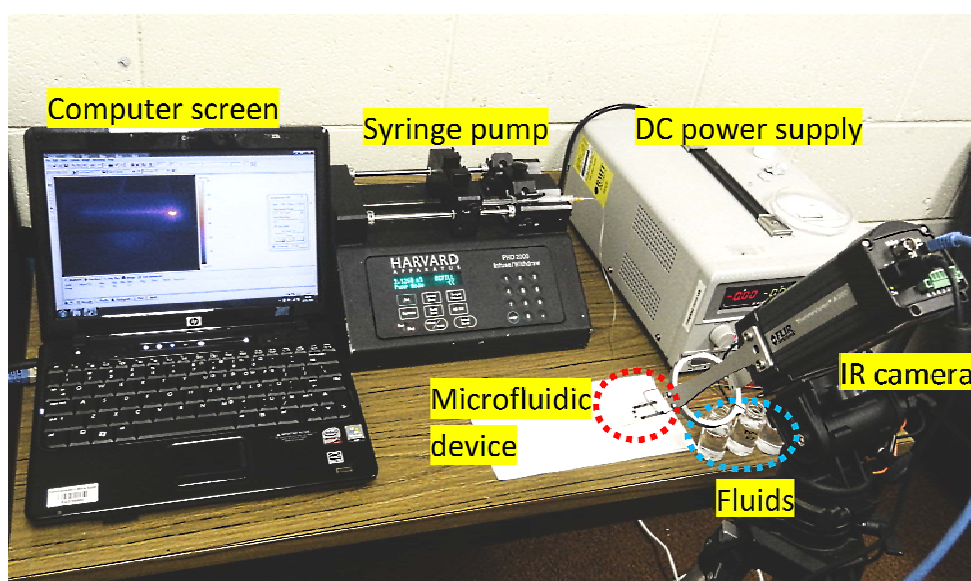

Fig. 1S. Experimental setup of our microfluidic system
